# Supplementary material
Source: PubMed Central journal article supplement (PMC3911166)
Supplement: JB.01013-13_zjb999093022so1.pdf [file JB.01013-13_zjb999093022so1.pdf]

Thompson and Gottesman

**SUPPLEMENTARY MATERIAL**

Table S1: Strain List

Table S2: Plasmid List

Table S3: Oligonucleotide List

Figure S1: MiaA effect on *rpoS750-lacZ* translational fusion activity**TABLE S1: - Strain List**

| <b>Strain</b> | <b>Genotype</b>                                                              | <b>Source</b>               |
|---------------|------------------------------------------------------------------------------|-----------------------------|
| AB003         | MG1655 $P_{BAD^-}$<br><i>rpoS990::lacZ kan rssB::tet</i>                     | (1)                         |
| CRB316        | MG1655 $P_{BAD^-}$<br><i>rpoS990::lacZ kan</i>                               | (2)                         |
| MG1655        | <i>Escherichia coli</i> K12                                                  | Lab strain                  |
| DJ480         | MG1655 $\Delta lacX74$                                                       | (3)                         |
| EM1050        | DJ480 <i>rpoS750-lacZ</i><br>translational fusion                            | (4)                         |
| KMT2          | MG1655 $\Delta truA::kan$                                                    | Nancy Gutgsell/J. Ofengand. |
| KMT3          | MG1655 $\Delta truB::kan$                                                    | "                           |
| KMT5          | MG1655 $\Delta rsuA::kan$                                                    | "                           |
| KMT6          | MG1655 $\Delta rluA::kan$                                                    | "                           |
| KMT8          | MG1655 $\Delta rluC::kan$                                                    | "                           |
| KMT25         | DJ480 <i>rpoS750-lacZ</i><br>$\Delta truA::kan$                              | EM1050 x P1(KMT2)           |
| KMT26         | DJ480 <i>rpoS750-lacZ</i><br>$\Delta truB::kan$                              | EM1050 x P1(KMT3)           |
| KMT27         | DJ480 <i>rpoS750-lacZ</i><br>$\Delta rluA::kan$                              | EM1050 x P1(KMT6)           |
| KMT28         | DJ480 <i>rpoS750-lacZ</i><br>$\Delta rluC::kan$                              | EM1050 x P1(KMT8)           |
| KMT30         | DJ480 <i>rpoS750-lacZ</i><br>$\Delta rsuA::kan$                              | EM1050 x P1(KMT5)           |
| KMT31         | DJ480 <i>rpoS750-lacZ</i><br><i>miaA::kan</i>                                | EM1050 x P1(TX2559)         |
| KMT54         | DJ480 <i>rpoS750-lacZ</i><br>translational fusion<br><i>miaA::kan</i> pBAD24 | EM1050 + pBAD24             |
| KMT55         | DJ480 <i>rpoS750-lacZ</i><br>translational fusion<br><i>miaA::kan</i> /pKMT1 | EM1050 + pKMT1              |
| KMT56         | DJ480 <i>rpoS750-lacZ</i><br>translational fusion<br><i>miaA::kan</i> /pKMT2 | EM1050 + pKMT2              |

|        |                                                                                                |                              |
|--------|------------------------------------------------------------------------------------------------|------------------------------|
| KMT61  | DJ480 <i>rpoS750-lacZ</i><br>translational fusion<br><i>Δhfq::cat</i>                          | EM1050 x P1(YN585)           |
| KMT62  | DJ480 <i>rpoS750-lacZ</i><br>translational fusion<br><i>Δhfq::cat</i> pBAD24                   | KMT61 + pBAD24               |
| KMT63  | DJ480 <i>rpoS750-lacZ</i><br>translational fusion<br><i>Δhfq::cat</i> pKMT1                    | KMT61 + pKMT1                |
| KMT64  | DJ480 <i>rpoS750-lacZ</i><br>translational fusion<br><i>Δhfq::cat</i> pKMT2                    | KMT61 + pKMT2                |
| KMT69  | <i>rpoS750-lacZ</i> translational<br>fusion pBAD24                                             | EM1050 + pBAD24              |
| KMT70  | <i>rpoS750-lacZ</i> translational<br>fusion pKMT1                                              | EM1050 + pKMT1               |
| KMT71  | <i>rpoS750-lacZ</i> translational<br>fusion pKMT2                                              | EM1050 + pKMT2               |
| KMT75  | MG1655 <i>rpoS::Tn10</i><br><i>ΔclpP::cat</i> pBAD24- <i>rpoS</i>                              | Caroline Ranquet-Brazzolotto |
| KMT80  | MG1655 <i>rpoS::Tn10</i><br>pBAD24- <i>rpoS</i>                                                | Caroline Ranquet-Brazzolotto |
| KMT83  | MG1655 <i>rpoS::Tn10</i><br><i>miaA::kan</i> pBAD24- <i>rpoS</i><br>MG1655 <i>miaA::kan</i>    | KMT80 x P1(TX2559)           |
| KMT99  | <i>rpoS::Tn10 ΔclpP::cat</i><br>pBAD24- <i>rpoS</i>                                            | KMT75 x P1(TX2559)           |
| KMT581 | MG1655 P <sub>BAD</sub> <sup>-</sup><br><i>rpoS990::lacZ kan hfq::cat</i>                      | CRB316 x P1(YN585)           |
| KMT582 | MG1655 P <sub>BAD</sub> <sup>-</sup><br><i>rpoS990::lacZ kan</i><br><i>miaA::cat</i> (Nrul)    | CRB316 x P1(TX4610)          |
| KMT584 | MG1655 P <sub>BAD</sub> <sup>-</sup><br><i>rpoS990::lacZ kan rssB::tet</i><br><i>miaA::cat</i> | AB003 x P1(TX4610)           |
| TX2559 | MG1655 <i>miaA::kan</i>                                                                        | Malcolm Winkler              |
| TX4610 | W3110 <i>miaA::cat</i> (Nrul)                                                                  | Malcolm Winkler              |
| YN585  | MG1655 <i>Δhfq::cat</i>                                                                        | YanNing Zhou                 |

**Table S2: Plasmid List**

---

| <b><u>Plasmid</u></b> | <b><u>Characteristics and markers</u></b>                  | <b><u>Reference</u></b> |
|-----------------------|------------------------------------------------------------|-------------------------|
| pBAD24                | <i>araBAD</i> promoter, ColE1 ori, <i>bla</i> , AraC       | (5)                     |
| pKMT1                 | <i>miaA</i> gene cloned into EcoRI / PstI digest of pBAD24 | This work               |
| pKMT2                 | <i>hfq</i> gene cloned into EcoRI / PstI digest pBAD24     | This work               |

---

**Table S3: Oligonucleotide List**

---

| <b><u>Oligonucleotide</u></b> | <b><u>Nucleotide Sequence (5'-3')</u></b> |
|-------------------------------|-------------------------------------------|
| KT01                          | ctagttgaattcaccatgagtgatatcagtaaggcgagc   |
| KT02                          | ctagttctgcagtcagcctgcatagaccaacaac        |
| KT03                          | ctagttgaattcaccatggctaaggggcaatcttta      |
| KT04                          | ctagttctgcagttattcggttcttcgctgctc         |

---

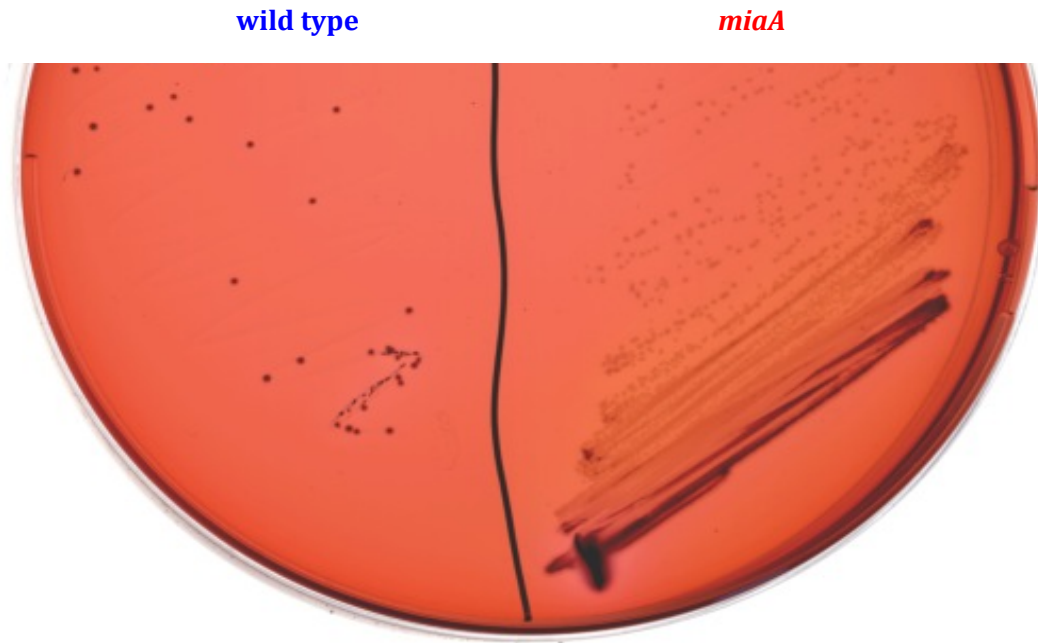

**Figure S1. MiaA effect on *rpoS750-lacZ* translation fusion activity.** Single colonies of wild type (EM1050) and *miaA* (KMT31) strains of *rpoS750-lacZ* translational fusion strains were picked and re-streaked on MacConkey-Lactose Agar Plates and incubated at 37°C overnight.

**REFERENCES**

1. **Bougdour A, Wickner S, Gottesman S.** 2006. Modulating RssB activity: IraP, a novel regulator of  $\sigma^S$  stability in *Escherichia coli*. *Genes and Development* **20**:884-897.
2. **Ranquet C, Gottesman S.** 2007. Translational regulation of the *Escherichia coli* stress factor RpoS: a role for SsrA and Lon. *J. Bacteriol* **189**:4872-4879.
3. **Cabrera JE, Jin DJ.** 2001. Growth phase and growth rate regulation of the rapA gene, encoding the RNA polymerase-associated protein RapA in *Escherichia coli*. *J. Bacteriol* **183**:6126-6134.
4. **Majdalani N, Hernandez D, Gottesman S.** 2002. Regulation and mode of action of the second small RNA activator of RpoS translation, RprA. *Molecular microbiology* **46**:813-826.
5. **Guzman LM, Belin D, Carson MJ, Beckwith J.** 1995. Tight regulation, modulation, and high-level expression by vectors containing the arabinose P<sub>BAD</sub> promoter. *J. Bacteriol* **177**:4121-4130.
